# Supplementary material for: A copper-amidocarboxylate based metal organic macrocycle and framework: synthesis, structure and catalytic activities towards microwave assisted alcohol oxidation and Knoevenagel reactions
Source: Royal Society of Chemistry journal article supplement (doi:10.1039/c9nj02064k), 2019-01-01
Supplement: c9nj02064k1.pdf [file c9nj02064k1.pdf]

## Supporting Information

### Copper-amidocarboxylate Based Metal Organic Macrocycle and Framework: Synthesis, Structure and Catalytic Activities towards Microwave assisted Alcohol Oxidation and Knoevenagel reaction

Anirban Karmakar<sup>1,\*</sup> Mohamed M.A. Soliman<sup>1</sup>, Elisabete C.B.A. Alegria,<sup>1,2</sup> Guilherme M. D. M. Rúbio,<sup>1</sup> M. Fátima C. Guedes da Silva<sup>1</sup> and Armando J. L. Pombeiro<sup>1,\*</sup>

<sup>1</sup>Centro de Química Estrutural, Instituto Superior Técnico, Universidade de Lisboa, Av. Rovisco Pais, 1049-001, Lisbon, Portugal. E-mail: [anirbanchem@gmail.com](mailto:anirbanchem@gmail.com); [pombeiro@tecnico.ulisboa.pt](mailto:pombeiro@tecnico.ulisboa.pt).

<sup>2</sup>Chemical Engineering Departament, Instituto Superior de Engenharia de Lisboa, Instituto Politécnico de Lisboa, R. Conselheiro Emídio Navarro, 1, 1959-007 Lisboa, Portugal.

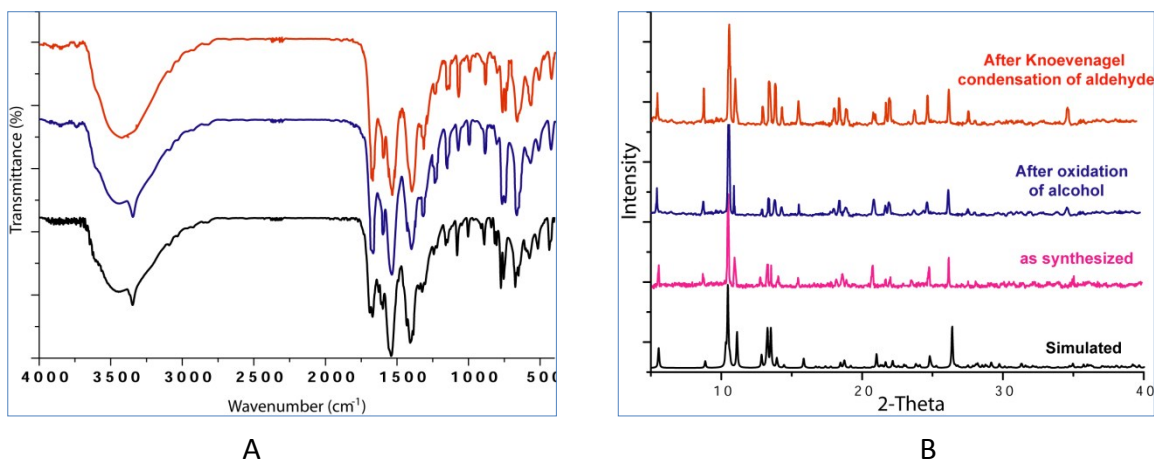

Figure S1 A) FT-IR spectra of **1** before (in black), after oxidation of alcohol (in blue) and Knoevenagel condensation of aldehyde (in red). B) Powder XRD diffractograms of **1** simulated (in black), as synthesized (in pink) and after catalytic oxidation of alcohol (in blue) and Knoevenagel condensation of aldehyde (in red).

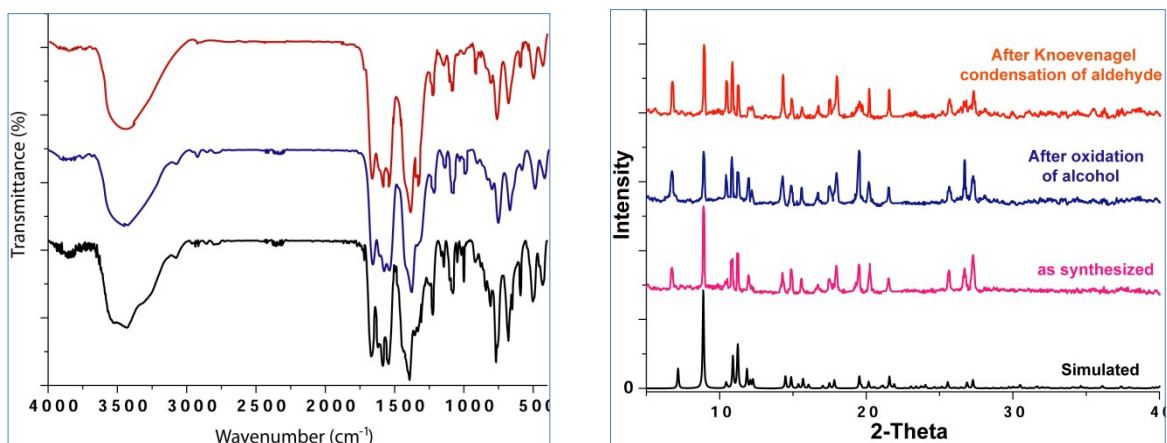

A

B

Figure S2 A) FT-IR spectra of **2** before (in black), after oxidation of alcohol (in blue) and Knoevenagel condensation of aldehyde (in red). B) Powder XRD diffractograms of **2** simulated (in black), as synthesized (in pink) and after catalytic oxidation of alcohol (in blue) and Knoevenagel condensation of aldehyde (in red).

| Table S1: Crystal data and structure refinement details |                                                                                |                                                                 |
|---------------------------------------------------------|--------------------------------------------------------------------------------|-----------------------------------------------------------------|
|                                                         | <b>1</b>                                                                       | <b>2</b>                                                        |
| Formulae                                                | C <sub>49</sub> H <sub>51</sub> Cu <sub>4</sub> N <sub>9</sub> O <sub>25</sub> | C <sub>27</sub> H <sub>27</sub> CuN <sub>5</sub> O <sub>8</sub> |
| Mol. wt.                                                | 1420.15                                                                        | 613.07                                                          |
| Crystal system                                          | Triclinic                                                                      | Monoclinic                                                      |
| Space group                                             | P-1                                                                            | P2 <sub>1</sub> /n                                              |
| Temperature /K                                          | 296                                                                            | 296                                                             |
| Wavelength /Å                                           | 0.71073                                                                        | 0.71073                                                         |
| <i>a</i> /Å                                             | 8.8368(5)                                                                      | 9.1236(8)                                                       |
| <i>b</i> /Å                                             | 9.9857(6)                                                                      | 15.7177(14)                                                     |
| <i>c</i> /Å                                             | 16.3956(9)                                                                     | 19.9209(17)                                                     |
| $\alpha$ /°                                             | 91.165(2)                                                                      | 90                                                              |
| $\beta$ /°                                              | 103.967(2)                                                                     | 93.270(2)                                                       |
| $\gamma$ /°                                             | 92.411(2)                                                                      | 90                                                              |
| <i>V</i> / Å <sup>3</sup>                               | 1402.06(14)                                                                    | 2852.0(4)                                                       |
| Z                                                       | 1                                                                              | 4                                                               |
| Density/Mgm <sup>-3</sup>                               | 1.682                                                                          | 1.428                                                           |
| Abs. Coeff. /mm <sup>-1</sup>                           | 1.591                                                                          | 0.823                                                           |
| F(000)                                                  | 724                                                                            | 1268                                                            |
| Refl. collected                                         | 30829                                                                          | 45098                                                           |
| Refl. unique                                            | 5744                                                                           | 5202                                                            |
| Max. 2 $\theta$ /°                                      | 26.426                                                                         | 25.382                                                          |
| Complete to 2 $\theta$ (%)                              | 99.6                                                                           | 99.8                                                            |
| Refl. with <i>I</i> > 2 $\sigma$ ( <i>I</i> )           | 4556                                                                           | 3161                                                            |
| Data/Restraints/Parameters                              | 5744/131/404                                                                   | 5202/18/334                                                     |
| Goof ( <i>F</i> <sup>2</sup> )                          | 1.037                                                                          | 1.001                                                           |
| R1 [ <i>I</i> > 2 <i>s</i> ( <i>I</i> )]                | 0.0466                                                                         | 0.0541                                                          |
| wR2 [ <i>I</i> > 2 <i>s</i> ( <i>I</i> )]               | 0.1195                                                                         | 0.1104                                                          |
| R1 [all data]                                           | 0.0621                                                                         | 0.1089                                                          |
| wR2 [all data]                                          | 0.1304                                                                         | 0.1314                                                          |

Table S2: Selected bond distances (Å) and angles (°) for compounds **1-2**

|          |                                                                                                                                                                                                                                                                                                                                                                                                                                                                                                                                                                                                                                                                                                                                                                                                                                                                                                                                                                                                                                                                                                                                                                                                                                                                                                                                                                                                                                                                                                                                                                                                                                                                                                                             |
|----------|-----------------------------------------------------------------------------------------------------------------------------------------------------------------------------------------------------------------------------------------------------------------------------------------------------------------------------------------------------------------------------------------------------------------------------------------------------------------------------------------------------------------------------------------------------------------------------------------------------------------------------------------------------------------------------------------------------------------------------------------------------------------------------------------------------------------------------------------------------------------------------------------------------------------------------------------------------------------------------------------------------------------------------------------------------------------------------------------------------------------------------------------------------------------------------------------------------------------------------------------------------------------------------------------------------------------------------------------------------------------------------------------------------------------------------------------------------------------------------------------------------------------------------------------------------------------------------------------------------------------------------------------------------------------------------------------------------------------------------|
| <b>1</b> | <p>Cu1-O2, 1.911(2); Cu1-O6, 1.927(2); Cu1-O7, 1.967(3); Cu1-O7, 2.000(3); Cu1-O9, 2.428(4); Cu1-Cu1', 2.9391(8); Cu2-O5, 1.920(3); Cu2-O1, 1.934(2); Cu2-O7, 1.957(3); Cu2-O8, 1.975(3); Cu2-O10A, 2.375(9); O1-Cu2, 1.934(2); O1-Cu2A, 1.940(5); O7-Cu2A, 1.775(5); O7-Cu1, 2.000(3); O8-Cu2A, 2.406(6); O5-Cu2A, 2.019(5)</p> <p>&lt;O2-Cu1-O6, 86.65(10); &lt;O2-Cu1-O7, 177.45(10); &lt;O6-Cu1-O7, 95.73(11) ; &lt;O2-Cu1-O7, 93.60(11); &lt;O6-Cu1-O7, 163.77(13); &lt;O7-Cu1-O7', 84.39(12); &lt;O2-Cu1-O9, 92.88(14); &lt;O6-Cu1-O9, 94.57(15); &lt;O7-Cu1-O9, 86.00(14); &lt;O7-Cu1-O9, 101.63(14); &lt;O2-Cu1-Cu1', 135.33(8); &lt;O6-Cu1-Cu1', 136.07(8); &lt;O7-Cu1-Cu1', 42.63(8); &lt;O7-Cu1-Cu1', 41.76(7); &lt;O9-Cu1-Cu1', 95.19(10); &lt;Cu2A-Cu2-O5, 87.9(4); &lt;Cu2A-Cu2-O1, 80.1(4); &lt;O5-Cu2-O1, 158.77(14); &lt;Cu2A-Cu2-O7, 64.7(4); &lt;O5-Cu2-O7, 95.87(11); &lt;O1-Cu2-O7, 94.76(10); &lt;Cu2A-Cu2-O8, 120.5(4); &lt;O5-Cu2-O8, 83.67(12); &lt;O1-Cu2-O8, 87.40(11); &lt;O7-Cu2-O8, 174.66(15); &lt;Cu2A-Cu2-O10A, 144.8(7); &lt;O5-Cu2-O10A, 91.0(3); &lt;O1-Cu2-O10A, 108.9(3); &lt;O7-Cu2-O10A, 80.4(5); &lt;O8-Cu2-O10A, 94.3(5); &lt;Cu2A-O7-Cu1, 128.4(2); &lt;Cu2-O7-Cu1, 117.73(13); &lt;Cu2A-O7-Cu1, 123.9(2); &lt;Cu2-O7-Cu1, 114.02(14); &lt;Cu1-O7-Cu1, 95.61(12); &lt;Cu2-Cu2A-O7, 94.5(5); &lt;Cu2-Cu2A-O1, 79.1(5); &lt;O7-Cu2A-O1, 100.7(2); &lt;Cu2-Cu2A-O5, 71.9(4); &lt;O7-Cu2A-O5, 98.5(2); &lt;O1-Cu2A-O5, 146.2(3); &lt;Cu2-Cu2A-O8, 45.0(4); &lt;O7-Cu2A-O8, 139.5(3); &lt;O1-Cu2A-O8, 76.0(2); &lt;O5-Cu2A-O8, 71.31(18); &lt;Cu2-Cu2A-H7O, 120.4(8); &lt;O7-Cu2A-H7O, 26.9(7); &lt;O1-Cu2A-H7O, 110.5(11); &lt;O5-Cu2A-H7O, 99.1(11); &lt;O8-Cu2A-H7O, 163.9(8);</p> |
| <b>2</b> | <p>Cu1-O1, 1.949(3); Cu1-O5, 1.953(3); Cu1-O2, 1.959(3); Cu1-O6, 1.970(3); Cu1-O7, 2.142(3); Cu1-Cu1', 2.6246(10).</p> <p>&lt;O1-Cu1-O5, 87.98(14); &lt;O1-Cu1-O2, 168.82(13); &lt;O5-Cu1-O2, 89.30(13); &lt;O1-Cu1-O6, 91.00(14); &lt;O5-Cu1-O6, 168.69(12); &lt;O2-Cu1-O6, 89.54(13); &lt;O1-Cu1-O7, 94.51(14); &lt;O5-Cu1-O7, 93.89(13); &lt;O2-Cu1-O7, 96.50(14); &lt;O6-Cu1-O7, 97.42(12); &lt;O1-Cu1-Cu1', 84.14(10); &lt;O5-Cu1-Cu1', 82.80(9); &lt;O2-Cu1-Cu1', 84.75(9); &lt;O6-Cu1-Cu1', 85.89(9); &lt;O7-Cu1-Cu1', 176.46(10).</p>                                                                                                                                                                                                                                                                                                                                                                                                                                                                                                                                                                                                                                                                                                                                                                                                                                                                                                                                                                                                                                                                                                                                                                               |

| <b>Table S3: Hydrogen bond geometry (Å, °) in compounds 1-2</b> |                 |           |           |           |             |
|-----------------------------------------------------------------|-----------------|-----------|-----------|-----------|-------------|
| Compound                                                        | D-H...A         | D...H (Å) | H...A (Å) | D...A (Å) | <D-H...A(°) |
| <b>1</b>                                                        | O12-H12O...O4   | 0.82      | 1.95      | 2.766(3)  | 179.7       |
|                                                                 | N1-H1N...O12    | 0.70(4)   | 2.36(4)   | 3.004(4)  | 154(5)      |
|                                                                 | N1-H1N...N2     | 0.70(4)   | 2.31(4)   | 2.639(4)  | 110(4)      |
|                                                                 | N3-H3N...N2     | 0.75(4)   | 2.18(4)   | 2.614(4)  | 118(4)      |
|                                                                 | O8-H8O...N4     | 0.866(19) | 2.70(3)   | 3.481(6)  | 151(4)      |
|                                                                 | O8-H8O...O11    | 0.866(19) | 2.30(3)   | 3.064(8)  | 147(4)      |
|                                                                 | O8-H8O...O10A   | 0.866(19) | 2.57(4)   | 3.201(13) | 130(4)      |
|                                                                 | O8-H8O...O10B   | 0.866(19) | 2.17(4)   | 2.93(2)   | 146(4)      |
|                                                                 | O7-H7O...O9     | 0.928(19) | 2.45(3)   | 3.016(5)  | 119(3)      |
|                                                                 | C7-H7...O12     | 0.93      | 2.64      | 3.252(4)  | 124         |
|                                                                 | C5-H5...O3      | 0.93      | 2.42      | 2.977(4)  | 118         |
|                                                                 | C20-H20...O4    | 0.93      | 2.41      | 2.981(4)  | 119         |
|                                                                 | C22-H01E...O10A | 0.96      | 2.52      | 3.064(9)  | 116         |
|                                                                 | C22-H01E...O10B | 0.96      | 2.81      | 3.170(2)  | 103         |
|                                                                 | C22-H01F...O10B | 0.96      | 2.58      | 3.150(3)  | 118         |
|                                                                 |                 |           |           |           |             |
| <b>2</b>                                                        | N3-H3N...O3     | 1.06(9)   | 2.47(9)   | 3.290(5)  | 133(6)      |
|                                                                 | N1 H1N N2       | 0.95(9)   | 2.23(9)   | 2.713(6)  | 111(7)      |
|                                                                 | C5-H5...O3      | 0.93      | 2.29      | 2.833(7)  | 116.8       |
|                                                                 | C24-H24A...O4   | 0.96      | 2.65      | 3.483(10) | 145.5       |
